# Supplementary material for: Androgenic potential of human fetal adrenals at the end of the first trimester
Source: PubMed Central journal article supplement — Endocr Connect. 2017 Jun 7;6(6):348–59. doi: 10.1530/EC-17-0085 (PMC5516548; doi:10.1530/ec-17-0085), 2017-06-07
Supplement: ec-6-348-s001.pdf [file ec-6-348-s001.pdf]

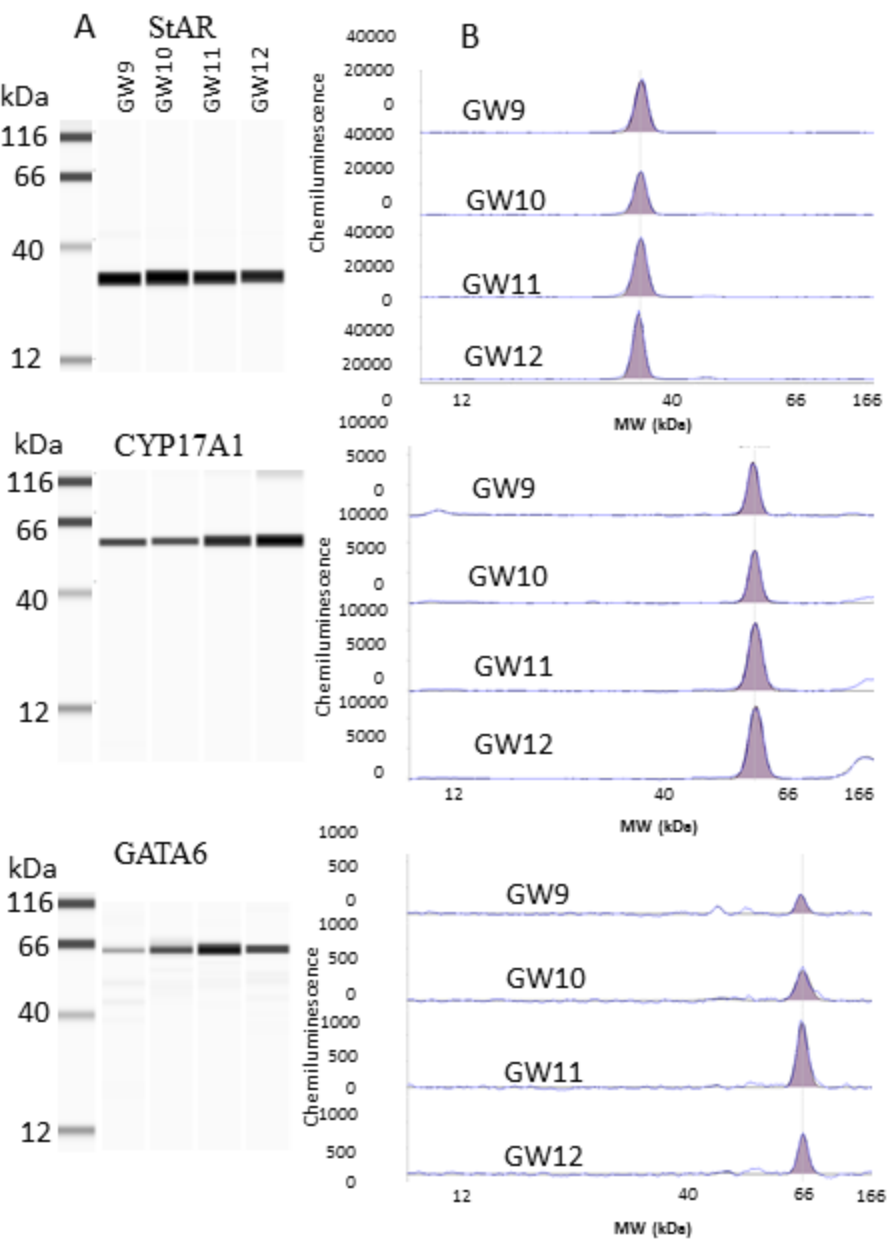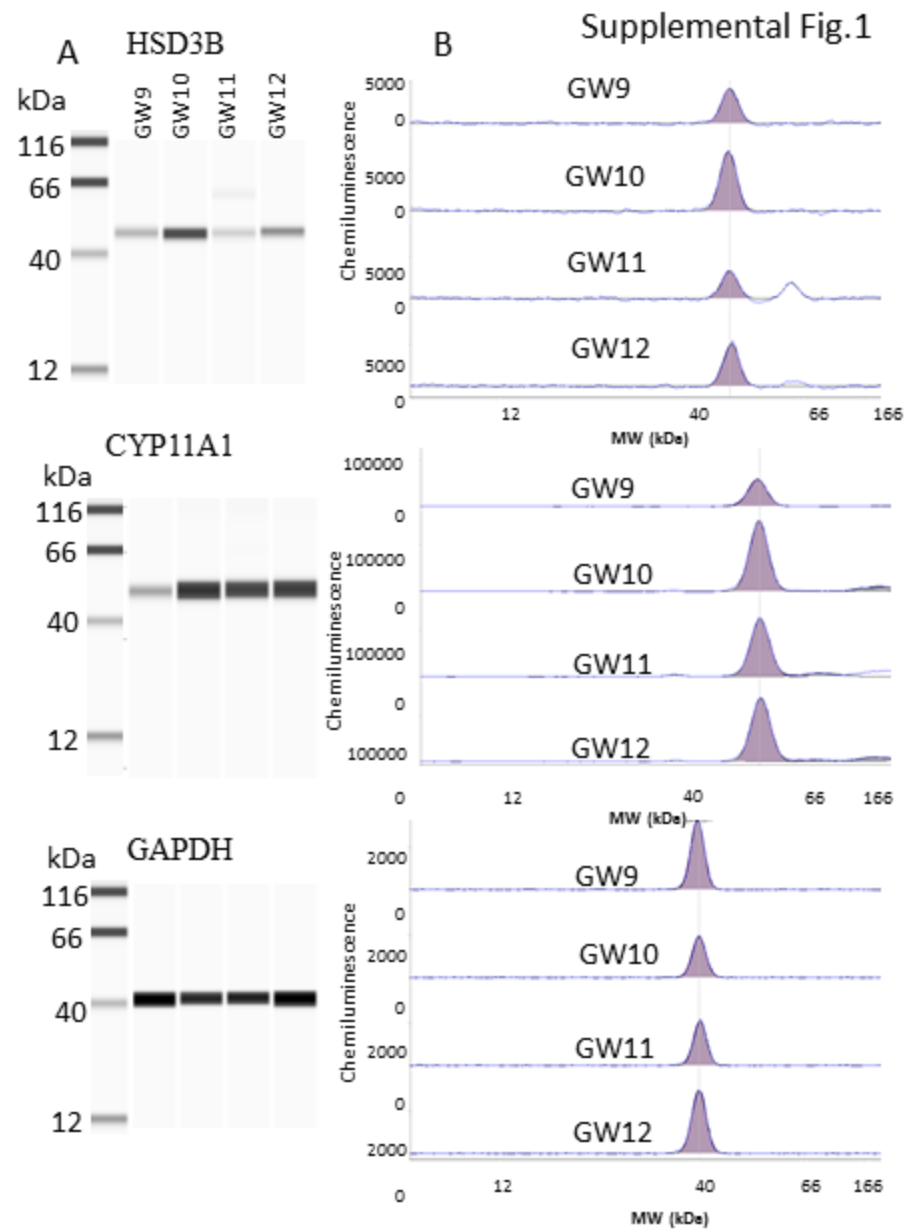

The Simple Western lane views of the expression of relevant steroidogenic enzymes (A) and system software generated electropherograms (B). Data analyses generated automatically by system software.
