# Supplementary material for: Androgenic potential of human fetal adrenals at the end of the first trimester
Source: PubMed Central journal article supplement — Endocr Connect. 2017 Jun 7;6(6):348–59. doi: 10.1530/EC-17-0085 (PMC5516548; doi:10.1530/ec-17-0085), 2017-06-07
Supplement: ec-6-348-t001.pdf [file ec-6-348-t001.pdf]

Table S1: inter-day repeatability (rsd %) reached for each target steroid hormones with the applied GC-MS/MS measurement method from tissue samples (basis of 10 mg samples).

| Name                                                      | inter-day repeatability (rsd%, n=8) |           |            |
|-----------------------------------------------------------|-------------------------------------|-----------|------------|
|                                                           | 10 µg/kg                            | 100 µg/kg | 1000 µg/kg |
| Pregnenolone                                              | 14.6                                | 12.3      | 10.5       |
| 17αOH-pregnenolone                                        | 23.5                                | 8.5       | 8.8        |
| DHEA                                                      | 6.2                                 | 4.1       | 5.2        |
| 5-androstene-3α,17β-diol                                  | 7.2                                 | 8.0       | 11.9       |
| 5-androstene-3β,17α-diol                                  | 17.9                                | 10.1      | 13.2       |
| 5-androstene-3β,17β-diol                                  | 12.6                                | 17.7      | 14.6       |
| Progesterone                                              | 8.1                                 | 9.5       | 3.1        |
| 17αOH-progesterone                                        | 17.7                                | 17.6      | 5.4        |
| Androstendione                                            | 8.7                                 | 6.9       | 4.4        |
| 17β-testosterone                                          | 3.2                                 | 2.2       | 1.9        |
| 17α-testosterone                                          | 4.3                                 | 3.5       | 5.2        |
| 5α-pregnane-17α-ol-3,20-dione_(17αOH-dihydroprogesterone) | 6.5                                 | 8.9       | 8.9        |
| 5α-Androstanedione                                        | 8.4                                 | 9.3       | 8.6        |
| 5β-Androstanedione                                        | 7.2                                 | 10.2      | 10.8       |
| 5α-dihydrotestosterone_(5α-DHT)                           | 6.4                                 | 3.4       | 3.9        |
| 5α-pregnane-3α-ol-20-one_(Allopregnanolone)               | 7.8                                 | 4.1       | 5.8        |
| 5α-pregnane-3α,17-diol-20-one_(17αOH-Allopregnanolone)    | 11.9                                | 13.8      | 13.1       |
| Androsterone                                              | 3.5                                 | 4.1       | 3.1        |
| Epiandrosterone                                           | 7.9                                 | 7.2       | 6.4        |
| Etiocholanolone                                           | 7.1                                 | 4.8       | 6.0        |
| 5α-Androstane-3α,17α-diol                                 | 8.6                                 | 9.0       | 9.5        |
| 5α-Androstane-3α,17β-diol                                 | 11.8                                | 8.8       | 9.2        |
| 5α-Androstane-3β,17α-diol                                 | 3.5                                 | 6.4       | 6.7        |
| 5α-Androstane-3β,17β-diol                                 | 11.5                                | 5.8       | 6.7        |
| 5β-Androstane-3α,17α-diol                                 | 17.2                                | 6.4       | 5.5        |
| 5β-Androstane-3α,17β-diol                                 | 14.0                                | 7.0       | 7.3        |
| 5β-Androstane-3β,17α-diol                                 | 11.3                                | 10.9      | 10.8       |
| 5β-Androstane-3β,17β-diol                                 | 10.5                                | 12.3      | 10.4       |
| Name                                                      | inter-day repeatability (rsd%, n=5) |           |            |
|                                                           | 0.1 µg/kg                           | 0.5 µg/kg | 5 µg/kg    |
| 17α-estradiol                                             | 13.4                                | 10.4      | 9.0        |
| 17β-estradiol                                             | 18.2                                | 13.2      | 9.5        |
| Estrone                                                   | 13.6                                | 9.3       | 5.5        |
